# Supplementary material
Source: HighWire-hosted journal article supplement (https://heart.bmj.com/content/105/24/1913)
Supplement: inline-supplementary-material-1 [file inline-supplementary-material-1.pdf]

Sonographer & Nurse led Clinics: Alerts & Frequency of Visit

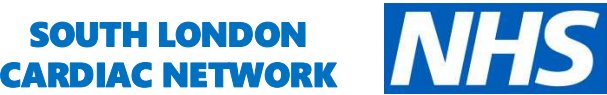

|                                                                                                                                                                                                                                                                                                                                                                                                                                                                                                                                                                                                                                                                                                                                                                                                                                                                                                                                                                                                                                                                                     |                                                                                                                                                                                                                                                                                                                                                                                                                                                                                                                                    |                                                                                                                                                                                                                                                                                                                                                                                                                                                                                                                                                                                                                         |                                                                                                                                                                                                                                                                                                                                                                                                                                                                                                                                                                                                                                                                                                                                                                                                                                                                                                                                                                                                                                                                                                                                                                                                                                                                                                                                                                                                                                                                                                                                                                                                                                                                                                         |                |                                                     |                                                                                                                               |                              |               |                                                                                                                                                                                                                                                                                                                                                                                                                                                                                                                                                                                                                                                                                                         |                                                                                                                                                                                                                                                                                                                                                                                                                                                                                                                                                                                                                                                                                   |  |
|-------------------------------------------------------------------------------------------------------------------------------------------------------------------------------------------------------------------------------------------------------------------------------------------------------------------------------------------------------------------------------------------------------------------------------------------------------------------------------------------------------------------------------------------------------------------------------------------------------------------------------------------------------------------------------------------------------------------------------------------------------------------------------------------------------------------------------------------------------------------------------------------------------------------------------------------------------------------------------------------------------------------------------------------------------------------------------------|------------------------------------------------------------------------------------------------------------------------------------------------------------------------------------------------------------------------------------------------------------------------------------------------------------------------------------------------------------------------------------------------------------------------------------------------------------------------------------------------------------------------------------|-------------------------------------------------------------------------------------------------------------------------------------------------------------------------------------------------------------------------------------------------------------------------------------------------------------------------------------------------------------------------------------------------------------------------------------------------------------------------------------------------------------------------------------------------------------------------------------------------------------------------|---------------------------------------------------------------------------------------------------------------------------------------------------------------------------------------------------------------------------------------------------------------------------------------------------------------------------------------------------------------------------------------------------------------------------------------------------------------------------------------------------------------------------------------------------------------------------------------------------------------------------------------------------------------------------------------------------------------------------------------------------------------------------------------------------------------------------------------------------------------------------------------------------------------------------------------------------------------------------------------------------------------------------------------------------------------------------------------------------------------------------------------------------------------------------------------------------------------------------------------------------------------------------------------------------------------------------------------------------------------------------------------------------------------------------------------------------------------------------------------------------------------------------------------------------------------------------------------------------------------------------------------------------------------------------------------------------------|----------------|-----------------------------------------------------|-------------------------------------------------------------------------------------------------------------------------------|------------------------------|---------------|---------------------------------------------------------------------------------------------------------------------------------------------------------------------------------------------------------------------------------------------------------------------------------------------------------------------------------------------------------------------------------------------------------------------------------------------------------------------------------------------------------------------------------------------------------------------------------------------------------------------------------------------------------------------------------------------------------|-----------------------------------------------------------------------------------------------------------------------------------------------------------------------------------------------------------------------------------------------------------------------------------------------------------------------------------------------------------------------------------------------------------------------------------------------------------------------------------------------------------------------------------------------------------------------------------------------------------------------------------------------------------------------------------|--|
| <div>Mitral Stenosis</div> <div><b>Severe:</b> every 6 months (ETT annually)<br/><b>Moderate:</b> every 1-2 years<br/><b>Mild:</b> every 2 years</div> <div><b>Echocardiographic alerts:</b><ul style="list-style-type: none"><li>New PA hypertension or rise in PA systolic pressure towards 50 mmHg</li><li>RV dysfunction</li></ul></div> <div><b>Other alerts:</b><ul style="list-style-type: none"><li>Symptoms</li><li>INR &gt; 4.0 or &lt; 1.5 in last 6 months</li><li>New atrial fibrillation</li><li>TIA or stroke</li><li>Patient request</li><li>Suggestion of endocarditis</li></ul></div>                                                                                                                                                                                                                                                                                                                                                                                                                                                                             | <div>Mitral Regurgitation</div> <div><b>Severe:</b> every 6 months + annual ETT<br/><b>Moderate:</b> every 1-2 years<br/><b>Mild:</b> not followed</div> <div><b>Echocardiographic alerts:</b><ul style="list-style-type: none"><li>LVSD approaching 40 mm</li><li>LV EF approaching 60%</li><li>PA systolic pressure approaching 50mmHg</li></ul></div> <div><b>Other alerts:</b><ul style="list-style-type: none"><li>Symptoms</li><li>New arrhythmia</li><li>Patient request</li><li>Suggestion of endocarditis</li></ul></div> | <div>Mitral &amp; Tricuspid Valve Repair</div> <div>– Echo at 12 months –<br/>If repair, competent, continue clinical surveillance annually in nurse-led clinic.</div> <div>If repair impaired, continue echo surveillance per native dysfunction.</div> <div><b>Echocardiographic alerts:</b><ul style="list-style-type: none"><li>Worsening regurgitation – see MR/TR sections</li><li>Systolic anterior motion</li></ul></div> <div><b>Other alerts:</b><ul style="list-style-type: none"><li>Spontaneous symptoms</li><li>New arrhythmia</li><li>Patient request</li><li>Suggestion of endocarditis</li></ul></div> | <div>Replacement Heart Valves</div> <div><b>Every valve once</b> postoperatively if not performed before discharge</div> <div><b>Mechanical valves</b> annually only if there is any of the following:<ul style="list-style-type: none"><li>Associated root dilatation (see specific guide)</li><li>LV dilatation</li><li>More than mild paraprosthetic regurgitation</li><li>More than moderate TR</li></ul></div> <div><b>New designs of biological aortic valve</b> every year after 5 years (e.g. Trifecta)</div> <div><b>Established aortic biological designs</b> every year after 10 years</div> <div><b>Biological mitral valves</b> every year after 5 years</div> <div><b>Ross procedures</b> every year</div> <div><b>AVR native root monitoring (previous bicuspid AV)</b><br/>(Dimensions on post-op echo)<table><tr><td>&lt;40 mm</td><td>No routine surveillance</td></tr><tr><td>40 – 45 mm</td><td>Echo at 5 yearly then review</td></tr><tr><td>&gt;45 mm</td><td>Annual echo</td></tr></table></div> <div><b>AVR with Aortic Root Replacement (Marfans/ Ehlers Danlos)</b><br/>Per valve type above<br/>2 yearly CMR or CT scanning (renal bloods needed prior to scan)</div> <div><b>Echocardiographic alerts:</b><ul style="list-style-type: none"><li>New or worsening regurgitation</li><li>Obstruction – reduction of EOA by 25%</li><li>Change in LV or systolic function (or RV for right-sided valves)</li></ul></div> <div><b>Other alerts:</b><ul style="list-style-type: none"><li>Exertional symptoms</li><li>TIA</li><li>INR &gt; 4.0 or &lt;2.0 during last 6 months</li><li>New arrhythmia</li><li>Patient request</li><li>Suggestion of endocarditis</li></ul></div> | <40 mm         | No routine surveillance                             | 40 – 45 mm                                                                                                                    | Echo at 5 yearly then review | >45 mm        | Annual echo                                                                                                                                                                                                                                                                                                                                                                                                                                                                                                                                                                                                                                                                                             |                                                                                                                                                                                                                                                                                                                                                                                                                                                                                                                                                                                                                                                                                   |  |
| <40 mm                                                                                                                                                                                                                                                                                                                                                                                                                                                                                                                                                                                                                                                                                                                                                                                                                                                                                                                                                                                                                                                                              | No routine surveillance                                                                                                                                                                                                                                                                                                                                                                                                                                                                                                            |                                                                                                                                                                                                                                                                                                                                                                                                                                                                                                                                                                                                                         |                                                                                                                                                                                                                                                                                                                                                                                                                                                                                                                                                                                                                                                                                                                                                                                                                                                                                                                                                                                                                                                                                                                                                                                                                                                                                                                                                                                                                                                                                                                                                                                                                                                                                                         |                |                                                     |                                                                                                                               |                              |               |                                                                                                                                                                                                                                                                                                                                                                                                                                                                                                                                                                                                                                                                                                         |                                                                                                                                                                                                                                                                                                                                                                                                                                                                                                                                                                                                                                                                                   |  |
| 40 – 45 mm                                                                                                                                                                                                                                                                                                                                                                                                                                                                                                                                                                                                                                                                                                                                                                                                                                                                                                                                                                                                                                                                          | Echo at 5 yearly then review                                                                                                                                                                                                                                                                                                                                                                                                                                                                                                       |                                                                                                                                                                                                                                                                                                                                                                                                                                                                                                                                                                                                                         |                                                                                                                                                                                                                                                                                                                                                                                                                                                                                                                                                                                                                                                                                                                                                                                                                                                                                                                                                                                                                                                                                                                                                                                                                                                                                                                                                                                                                                                                                                                                                                                                                                                                                                         |                |                                                     |                                                                                                                               |                              |               |                                                                                                                                                                                                                                                                                                                                                                                                                                                                                                                                                                                                                                                                                                         |                                                                                                                                                                                                                                                                                                                                                                                                                                                                                                                                                                                                                                                                                   |  |
| >45 mm                                                                                                                                                                                                                                                                                                                                                                                                                                                                                                                                                                                                                                                                                                                                                                                                                                                                                                                                                                                                                                                                              | Annual echo                                                                                                                                                                                                                                                                                                                                                                                                                                                                                                                        |                                                                                                                                                                                                                                                                                                                                                                                                                                                                                                                                                                                                                         |                                                                                                                                                                                                                                                                                                                                                                                                                                                                                                                                                                                                                                                                                                                                                                                                                                                                                                                                                                                                                                                                                                                                                                                                                                                                                                                                                                                                                                                                                                                                                                                                                                                                                                         |                |                                                     |                                                                                                                               |                              |               |                                                                                                                                                                                                                                                                                                                                                                                                                                                                                                                                                                                                                                                                                                         |                                                                                                                                                                                                                                                                                                                                                                                                                                                                                                                                                                                                                                                                                   |  |
| <div>Aortic Stenosis</div> <div><table><tr><td>V max &gt;4.0 m/s or EOA &lt; 1.0cm<sup>2</sup></td><td>every 6 months + consider annual ETT</td></tr><tr><td>V max 3.5 – 4.0 m/s + AV Calcium</td><td>every 6 months</td></tr><tr><td>V max 3.0 – 4.0 m/s or EOI 1.0 – 1.5cm<sup>2</sup></td><td>every year + ETT at baseline, when becomes severe, and consider every year after this if early surgery clinically appropriate</td></tr><tr><td>V max 2.5 – 3.0 m/s</td><td>every 3 years</td></tr></table></div> <div><b>Echocardiographic Alerts</b><ul style="list-style-type: none"><li>Any reduction in LV ejection fraction</li><li>EOI ≤0.6cm<sup>2</sup></li><li>V max ≥5.0m/s</li><li>Rapid progression of V max &gt; 0.3 m/s per year</li><li>New diastolic dysfunction (pseudonormal or restrictive)</li><li>Aortic root dilated to 45 mm (Marfan’s), 55 mm (other)</li></ul></div> <div><b>Other Alerts</b><ul style="list-style-type: none"><li>Spontaneous symptoms</li><li>New arrhythmia</li><li>Patient request</li><li>Suggestion of endocarditis</li></ul></div> | V max >4.0 m/s or EOA < 1.0cm <sup>2</sup>                                                                                                                                                                                                                                                                                                                                                                                                                                                                                         | every 6 months + consider annual ETT                                                                                                                                                                                                                                                                                                                                                                                                                                                                                                                                                                                    | V max 3.5 – 4.0 m/s + AV Calcium                                                                                                                                                                                                                                                                                                                                                                                                                                                                                                                                                                                                                                                                                                                                                                                                                                                                                                                                                                                                                                                                                                                                                                                                                                                                                                                                                                                                                                                                                                                                                                                                                                                                        | every 6 months | V max 3.0 – 4.0 m/s or EOI 1.0 – 1.5cm <sup>2</sup> | every year + ETT at baseline, when becomes severe, and consider every year after this if early surgery clinically appropriate | V max 2.5 – 3.0 m/s          | every 3 years | <div>Aortic Regurgitation</div> <div><b>Severe:</b> every 6 months or every 3 months at request of cardiologist if LV significantly dilated (consider ETT annually)<br/><b>Moderate:</b> every 1-2 years<br/><b>Mild:</b> not unless aortic root dilated</div> <div><b>Echocardiographic alerts:</b><ul style="list-style-type: none"><li>LVSD approaching 50 mm or LVDD 70 mm</li><li>LVSD change (&gt;5mm from previous study) or volume increase since last study</li><li>LVEF approaching 50%</li></ul></div> <div><b>Other alerts:</b><ul style="list-style-type: none"><li>Spontaneous symptoms</li><li>New arrhythmia</li><li>Patient request</li><li>Suggestion of endocarditis</li></ul></div> | <div>Aortic Root Dilatation</div> <div><b>Marfan:</b> annually unless dilated to &gt; 40 mm, then every 6 months<br/><b>Non-Marfan:</b> annually<br/><b>Bicuspid:</b> annually</div> <div><b>Echocardiographic alerts:</b><ul style="list-style-type: none"><li>Marfan 45 mm or change &gt; 3 mm in one year</li><li>Bicuspid valve 55 mm or change &gt; 3 mm in one year</li><li>Non-Marfan 55 mm or change &gt; 3 mm in one year</li><li>Worsening AR</li></ul></div> <div><b>Other alerts:</b><ul style="list-style-type: none"><li>Chest pain, dysphagia or change in voice</li><li>New arrhythmia</li><li>Patient request</li><li>Suggestion of endocarditis</li></ul></div> |  |
| V max >4.0 m/s or EOA < 1.0cm <sup>2</sup>                                                                                                                                                                                                                                                                                                                                                                                                                                                                                                                                                                                                                                                                                                                                                                                                                                                                                                                                                                                                                                          | every 6 months + consider annual ETT                                                                                                                                                                                                                                                                                                                                                                                                                                                                                               |                                                                                                                                                                                                                                                                                                                                                                                                                                                                                                                                                                                                                         |                                                                                                                                                                                                                                                                                                                                                                                                                                                                                                                                                                                                                                                                                                                                                                                                                                                                                                                                                                                                                                                                                                                                                                                                                                                                                                                                                                                                                                                                                                                                                                                                                                                                                                         |                |                                                     |                                                                                                                               |                              |               |                                                                                                                                                                                                                                                                                                                                                                                                                                                                                                                                                                                                                                                                                                         |                                                                                                                                                                                                                                                                                                                                                                                                                                                                                                                                                                                                                                                                                   |  |
| V max 3.5 – 4.0 m/s + AV Calcium                                                                                                                                                                                                                                                                                                                                                                                                                                                                                                                                                                                                                                                                                                                                                                                                                                                                                                                                                                                                                                                    | every 6 months                                                                                                                                                                                                                                                                                                                                                                                                                                                                                                                     |                                                                                                                                                                                                                                                                                                                                                                                                                                                                                                                                                                                                                         |                                                                                                                                                                                                                                                                                                                                                                                                                                                                                                                                                                                                                                                                                                                                                                                                                                                                                                                                                                                                                                                                                                                                                                                                                                                                                                                                                                                                                                                                                                                                                                                                                                                                                                         |                |                                                     |                                                                                                                               |                              |               |                                                                                                                                                                                                                                                                                                                                                                                                                                                                                                                                                                                                                                                                                                         |                                                                                                                                                                                                                                                                                                                                                                                                                                                                                                                                                                                                                                                                                   |  |
| V max 3.0 – 4.0 m/s or EOI 1.0 – 1.5cm <sup>2</sup>                                                                                                                                                                                                                                                                                                                                                                                                                                                                                                                                                                                                                                                                                                                                                                                                                                                                                                                                                                                                                                 | every year + ETT at baseline, when becomes severe, and consider every year after this if early surgery clinically appropriate                                                                                                                                                                                                                                                                                                                                                                                                      |                                                                                                                                                                                                                                                                                                                                                                                                                                                                                                                                                                                                                         |                                                                                                                                                                                                                                                                                                                                                                                                                                                                                                                                                                                                                                                                                                                                                                                                                                                                                                                                                                                                                                                                                                                                                                                                                                                                                                                                                                                                                                                                                                                                                                                                                                                                                                         |                |                                                     |                                                                                                                               |                              |               |                                                                                                                                                                                                                                                                                                                                                                                                                                                                                                                                                                                                                                                                                                         |                                                                                                                                                                                                                                                                                                                                                                                                                                                                                                                                                                                                                                                                                   |  |
| V max 2.5 – 3.0 m/s                                                                                                                                                                                                                                                                                                                                                                                                                                                                                                                                                                                                                                                                                                                                                                                                                                                                                                                                                                                                                                                                 | every 3 years                                                                                                                                                                                                                                                                                                                                                                                                                                                                                                                      |                                                                                                                                                                                                                                                                                                                                                                                                                                                                                                                                                                                                                         |                                                                                                                                                                                                                                                                                                                                                                                                                                                                                                                                                                                                                                                                                                                                                                                                                                                                                                                                                                                                                                                                                                                                                                                                                                                                                                                                                                                                                                                                                                                                                                                                                                                                                                         |                |                                                     |                                                                                                                               |                              |               |                                                                                                                                                                                                                                                                                                                                                                                                                                                                                                                                                                                                                                                                                                         |                                                                                                                                                                                                                                                                                                                                                                                                                                                                                                                                                                                                                                                                                   |  |
| <div>Pulmonary Stenosis</div> <div><b>Severe:</b> every year<br/><b>Moderate:</b> every 1-2 years<br/><b>Mild:</b> no follow up unless indicated</div> <div><b>Echocardiographic alerts:</b><ul style="list-style-type: none"><li>New RV dilation</li><li>Velocity &gt; 3.5 m/s</li></ul></div> <div><b>Other alerts:</b><ul style="list-style-type: none"><li>Spontaneous symptoms</li><li>New arrhythmia</li><li>Suggestion of endocarditis</li><li>Patient request</li></ul></div>                                                                                                                                                                                                                                                                                                                                                                                                                                                                                                                                                                                               | <div>Tricuspid / Pulmonary Regurgitation</div> <div><b>Severe:</b> every 6 months<br/><b>Moderate:</b> every 1-2 years</div> <div><b>Echocardiographic alerts:</b><ul style="list-style-type: none"><li>Progressive RV dilatation</li><li>New RV hypokinesis</li></ul></div> <div><b>Other alerts:</b><ul style="list-style-type: none"><li>Spontaneous symptoms</li><li>New arrhythmia</li><li>Suggestion of endocarditis</li><li>Patient request</li></ul></div>                                                                 | <div>Post-Endocarditis (non-operated)</div> <div>Echocardiogram at 1, 3, and 6 months<br/>Then according to residual pathology</div>                                                                                                                                                                                                                                                                                                                                                                                                                                                                                    | <div>Bicuspid Valve (no AS/AR)</div> <div>Every 3 years</div>                                                                                                                                                                                                                                                                                                                                                                                                                                                                                                                                                                                                                                                                                                                                                                                                                                                                                                                                                                                                                                                                                                                                                                                                                                                                                                                                                                                                                                                                                                                                                                                                                                           |                |                                                     |                                                                                                                               |                              |               |                                                                                                                                                                                                                                                                                                                                                                                                                                                                                                                                                                                                                                                                                                         |                                                                                                                                                                                                                                                                                                                                                                                                                                                                                                                                                                                                                                                                                   |  |
